# Supplementary material for: Frequency of providing a palliative approach to care in family practice: a chart review and perceptions of healthcare practitioners in Canada
Source: Springer Nature journal article supplement (doi:10.1186/s12875-021-01400-4), 2021-03-27
Supplement: MOESM1 [file 19013080]

**CHART ABSTRACTION FORM**

Range of date being reviewed (date of death minus 1 year): \_\_\_\_\_

**A. Demographic Variables:**

1. Age at death: \_\_\_\_\_ years

2. Sex:

 Female Male

3. Education:

 Did not complete secondary school or high school Completed secondary or high school Had some university education or completed a community college, technical college, or post-secondary program (for example; trade, technical or vocational school) University degree (for example; BA, BSc, BSN) Graduate degree (for example; MD, DDS, DMD, DVM, OD, Master's, or PhD) *Specify:* \_\_\_\_\_ Information not located in chart

4. Relationship Status at the time of death:

 Married or living as married Widowed Never married Divorced or separated; not remarried *Specify:* \_\_\_\_\_

5. Living Arrangement prior to transfer to place of death (if applicable):

 At home (apartment, townhouse, bungalow, etc) Retirement Residence Long-Term Care or Nursing Home Vulnerable Housing (eg. Shelter, transition home, no home) Other (e.g *specify*):  
\_\_\_\_\_

6. Primary Caregivers (e.g. informal care team, family):

| Name | Relationship |
|------|--------------|
|      |              |
|      |              |
|      |              |

7. Chronic Life-Limiting Illnesses contributing to death: *check all that apply*

- Cancer
- Cardiac disease (CAD, CHF, etc.)
- Stroke
- Lung disease (COPD, ILD, etc.)
- Dementia
- Neurodegenerative disease (ALS, MS, Multisystem Atrophy, Parkinson, HD, etc)
- Liver disease
- Renal disease
- Frailty
- Other: \_\_\_\_\_
- Other: \_\_\_\_\_

8. Chronic Life-Limiting Illness Most Responsible For Death:

- Cancer
- Cardiac disease (CAD, CHF, etc.)
- Stroke
- Lung disease (COPD, ILD, etc.)
- Dementia
- Neurodegenerative disease (ALS, MS, Multisystem Atrophy, Parkinson, HD, etc)
- Liver disease
- Renal disease
- Frailty
- Other: \_\_\_\_\_

**B. Billing**

| <b>Code Used</b>                                                                                                                                  | <b>Dates when code was used</b> |
|---------------------------------------------------------------------------------------------------------------------------------------------------|---------------------------------|
| Case management<br><input type="checkbox"/> G512                                                                                                  |                                 |
| Home Care Application<br><input type="checkbox"/> K070                                                                                            |                                 |
| Death Certificate, following patient to end<br><input type="checkbox"/> A771                                                                      |                                 |
| Home visit codes<br><input type="checkbox"/> B966<br><br><input type="checkbox"/> B998<br><br><input type="checkbox"/> A901                       |                                 |
| Palliative Care Support >20 mins<br><input type="checkbox"/> K023                                                                                 |                                 |
| Counselling of relatives<br><input type="checkbox"/> K015                                                                                         |                                 |
| <input type="checkbox"/> G511                                                                                                                     |                                 |
| Consult Codes<br><input type="checkbox"/> K730<br><input type="checkbox"/> K731<br><input type="checkbox"/> K738<br><input type="checkbox"/> K739 |                                 |

**C. Advance Care Planning**

Take into consideration only if and when these conversations occurred. Include date for all relevant variables.

| <b>Variable</b>                                                                                       | <b>Date First Occurred (DD/MM/YYYY)</b> | <b>Repeat Conversation</b>   |
|-------------------------------------------------------------------------------------------------------|-----------------------------------------|------------------------------|
| <input type="checkbox"/> Understanding of severity of illness (illness awareness)                     |                                         | <input type="checkbox"/> yes |
| <input type="checkbox"/> Prognosis                                                                    |                                         | <input type="checkbox"/> yes |
| <input type="checkbox"/> Values/beliefs/priorities moving forward (ACP)                               |                                         | <input type="checkbox"/> yes |
| <input type="checkbox"/> Goals of care for treatment decisions (to pursue a treatment or not and why) |                                         | <input type="checkbox"/> yes |
| <input type="checkbox"/> Desired place of death                                                       |                                         | <input type="checkbox"/> yes |
| <input type="checkbox"/> DNR/DNR-C                                                                    |                                         | <input type="checkbox"/> yes |
| <input type="checkbox"/> Will                                                                         |                                         | <input type="checkbox"/> yes |
| <input type="checkbox"/> POA/SDM                                                                      |                                         | <input type="checkbox"/> yes |
| <input type="checkbox"/> Funeral arrangements                                                         |                                         | <input type="checkbox"/> yes |

**D. Home Care**

(Home visits by practitioners)

| <b>Type of service</b> | <b>Date Service Started (DD/MM/YYYY)</b> |
|------------------------|------------------------------------------|
|                        |                                          |
|                        |                                          |
|                        |                                          |
|                        |                                          |

**E. Community Services/Resources**

**(CCAC or other community referrals, any evidence that it happened, date, f/u with patients))**

| Type of service | Date (DD/MMM/YYYY) |
|-----------------|--------------------|
|                 |                    |
|                 |                    |
|                 |                    |
|                 |                    |

**F. Caregiver/Informal Supports**

**(Caregiver presence in encounters/ caregiver issues/ well being addressed)**

| Variable                                  | Occurred? |
|-------------------------------------------|-----------|
| Present during >1 encounters with patient | YES       |
|                                           | NO        |
| Caregiver concerns/well being discussed   | YES       |
|                                           | NO        |
| Caregiver concerns/well being readdressed | YES       |
|                                           | NO        |

**G. Symptoms**

| Type of service                                                                                                      | Provider | Date (DD/MMM/YYYY) |
|----------------------------------------------------------------------------------------------------------------------|----------|--------------------|
| <input type="checkbox"/> Were physical symptoms discussed?                                                           |          |                    |
| <input type="checkbox"/> Were they reassessed?                                                                       |          |                    |
| <input type="checkbox"/> Were medications prescribed?                                                                |          |                    |
| <input type="checkbox"/> Were any tools used to assess symptoms?<br><i>Specify:</i> _____<br><i>Frequency:</i> _____ |          |                    |
| <input type="checkbox"/> Existential/ Spiritual Concerns                                                             |          |                    |

|                                                      |  |  |
|------------------------------------------------------|--|--|
| <input type="checkbox"/> Cultural Concerns           |  |  |
| <input type="checkbox"/> Financial Concerns          |  |  |
| <input type="checkbox"/> Other psychosocial concerns |  |  |

**H. Continuity of Care**

| Variable                      | No. of encounters | Type of Encounter                          |                                                |
|-------------------------------|-------------------|--------------------------------------------|------------------------------------------------|
| MRP encounters                |                   | <input type="checkbox"/> Phone<br>Date(s): | <input type="checkbox"/> In-Person<br>Date(s): |
| Resident encounters           |                   | <input type="checkbox"/> Phone<br>Date(s): | <input type="checkbox"/> In-Person<br>Date(s): |
| Nurse practitioner encounters |                   | <input type="checkbox"/> Phone<br>Date(s): | <input type="checkbox"/> In-Person<br>Date(s): |
| OT encounters                 |                   | <input type="checkbox"/> Phone<br>Date(s): | <input type="checkbox"/> In-Person<br>Date(s): |
| PT encounters                 |                   | <input type="checkbox"/> Phone<br>Date(s): | <input type="checkbox"/> In-Person<br>Date(s): |
| Pharmacy encounters           |                   | <input type="checkbox"/> Phone<br>Date(s): | <input type="checkbox"/> In-Person<br>Date(s): |
| Social work encounters        |                   | <input type="checkbox"/> Phone<br>Date(s): | <input type="checkbox"/> In-Person<br>Date(s): |

|                                       |  |                                            |                                                |
|---------------------------------------|--|--------------------------------------------|------------------------------------------------|
|                                       |  |                                            |                                                |
| Nurse encounters                      |  | <input type="checkbox"/> Phone<br>Date(s): | <input type="checkbox"/> In-Person<br>Date(s): |
| Palliative care consultant encounters |  | <input type="checkbox"/> Phone<br>Date(s): | <input type="checkbox"/> In-Person<br>Date(s): |
| Home visits                           |  | Date:                                      |                                                |
| Clinic visits                         |  | Date:                                      |                                                |
| Hospital visits                       |  | Date:                                      |                                                |
| Hospice visits                        |  | Date:                                      |                                                |
| LTC visits                            |  | Date:                                      |                                                |

**I. Specialist Care**

| Type of Specialist | Name | Date<br>(DD/MMM/YYYY) |
|--------------------|------|-----------------------|
|                    |      |                       |
|                    |      |                       |
|                    |      |                       |
|                    |      |                       |

**J. Other**

| <b>Variable</b>                  |
|----------------------------------|
| Place of death                   |
| Length of stay at place of death |
| On call encounters               |
| ER encounters                    |
| Cause of death                   |
| Other Comments:                  |
